# Supplementary material
Source: ML conference proceedings conference paper supplement (https://openaccess.thecvf.com/content/WACV2024/html/Shi_Conditional_Velocity_Score_WACV_2024_paper.html)
Supplement: Supplementary file 1 [file Shi_Conditional_Velocity_Score_WACV_2024_supplemental.pdf]

# Conditional Velocity Score Estimation for Image Restoration Supplementary Material

Ziqiang Shi, Rujie Liu  
Fujitsu R&D Center  
Beijing, China

shiziqiang@fujitsu.com

## 1. Observation Velocity Score Approximation

Let  $\mathbf{u}_0 = (\mathbf{x}_0, \mathbf{v}_0)^\top$ ,  $\mathbf{u}_t = (\mathbf{x}_t, \mathbf{v}_t)^\top$ , they are linked by the probabilistic transition kernel of linear SDEs [2]. In terms of CLD as follows

$$\begin{cases} d\mathbf{x}_t &= M^{-1}\beta\mathbf{v}_t dt, \\ d\mathbf{v}_t &= -\beta\mathbf{x}_t dt + \Gamma\beta M^{-1}\mathbf{v}_t dt + \sqrt{2\Gamma}\beta d\mathbf{w}_t. \end{cases} \quad (1)$$

we have the exact relation [1]

$$p(\mathbf{u}_t|\mathbf{u}_0) = \mathcal{N}(\mathbf{u}_t; \boldsymbol{\mu}_t, \boldsymbol{\Sigma}_t), \quad (2)$$

where

$$\begin{aligned} \boldsymbol{\mu}_t &= \begin{pmatrix} 2\beta t\Gamma^{-1}\mathbf{x}_0 + 4\beta t\Gamma^{-2}\mathbf{v}_0 + \mathbf{x}_0 \\ -\beta t\mathbf{x}_0 - 2\beta t\Gamma^{-1}\mathbf{v}_0 + \mathbf{v}_0 \end{pmatrix} e^{-2\beta t\Gamma^{-1}} \\ &= e^{-2\beta t\Gamma^{-1}} \begin{pmatrix} 2\beta t\Gamma^{-1} + 1 & 4\beta t\Gamma^{-2} \\ -\beta t & -2\beta t\Gamma^{-1} + 1 \end{pmatrix} \begin{pmatrix} \mathbf{x}_0 \\ \mathbf{v}_0 \end{pmatrix} \\ &= \mathbf{D}_t \begin{pmatrix} \mathbf{x}_0 \\ \mathbf{v}_0 \end{pmatrix}, \end{aligned} \quad (3)$$

and

$$\begin{aligned} \boldsymbol{\Sigma}_t &= \Sigma_t \otimes \mathbf{I}_d, \\ \Sigma_t &= \begin{pmatrix} \Sigma_t^{xx} & \Sigma_t^{xv} \\ \Sigma_t^{xv} & \Sigma_t^{vv} \end{pmatrix} e^{-4\beta t\Gamma^{-1}}, \\ \Sigma_t^{xx} &= \Sigma_0^{xx} + e^{4\beta t\Gamma^{-1}} - 1 + 4\beta t\Gamma^{-1}(\Sigma_0^{xx} - 1) \\ &\quad + 4\beta^2 t^2 \Gamma^{-2}(\Sigma_0^{xx} - 2) + 16\beta^2 t^2 \Gamma^{-4} \Sigma_0^{vv}, \\ \Sigma_t^{xv} &= -\beta^2 t \Sigma_0^{xx} + 4\beta t \Gamma^{-2} \Sigma_0^{vv} \\ &\quad - 2\beta^2 t^2 \Gamma^{-1}(\Sigma_0^{xx} - 2) - 8\beta^2 t^2 \Gamma^{-3} \Sigma_0^{vv}, \\ \Sigma_t^{vv} &= \frac{\Gamma^2}{4} (e^{4\beta t\Gamma^{-1}} - 1) + \beta t \Gamma + \beta^2 t^2 (\Sigma_0^{xx} - 2) \\ &\quad + \Sigma_0^{vv} (1 + 4\beta t^2 \Gamma^{-2} - 4\beta t \Gamma^{-1}). \end{aligned} \quad (4)$$

Then we can determine the probability of observing  $\mathbf{y}$  given  $\mathbf{u}_t$  by the following proposition.

**Proposition 1.1.** (Determine the probability of observing  $\mathbf{y}$  given  $\mathbf{u}_t$ ) For simplicity of notation,  $\mathbb{E}_{\mathbf{u}_0 \sim p(\mathbf{u}_0|\mathbf{u}_t)}$  is denoted as  $\mathbb{E}$ . Under the condition of  $\mathbf{u}_t$  at time  $t$ , the probability of observing  $\mathbf{y}$  can be derived from

$$\mathbb{E}[p(\mathbf{y}|\mathbf{u}_0)] = p(\mathbf{y}|\hat{\mathbf{u}}_0) + c\mathbb{E}\left[\|\mathcal{H}(\mathbf{x}_0 - \hat{\mathbf{x}}_0)\|^2 \|\mathbf{x}_0 - \hat{\mathbf{x}}_0\|^2\right], \quad (5)$$

where

$$c = \frac{1}{\sigma^2} \int_0^1 \frac{1}{2\pi^{d/2}\sigma^{d/2}} \exp\left(-\frac{s^2}{2}\right) (1-s) \left(\frac{s^2}{\sigma^2} - 1\right) ds. \quad (6)$$

*Proof.* Assuming  $\mathbf{u}_0$  is fixed, known from the image restoration problem formulation,  $h(s) = p(\mathbf{y}|s\mathbf{u}_0 + (1-s)\hat{\mathbf{u}}_0)$  is a quadratically differentiable function of  $s$ . So from the second-order Taylor formula, expand  $h(s)$  at 0, we have

$$h(1) = h(0) + h'(0) + \int_0^1 h''(s)(1-s) ds, \quad (7)$$

which is

$$p(\mathbf{y}|\mathbf{u}_0) \quad (8)$$

$$= p(\mathbf{y}|\hat{\mathbf{u}}_0) + p'(\mathbf{y}|s\mathbf{u}_0 + (1-s)\hat{\mathbf{u}}_0)(\mathbf{u}_0 - \hat{\mathbf{u}}_0)|_{s=0} \quad (9)$$

$$+ \int_0^1 (\mathbf{u}_0 - \hat{\mathbf{u}}_0)^\top \frac{d^2 p(\mathbf{y}|s\mathbf{u}_0 + (1-s)\hat{\mathbf{u}}_0)}{ds^2} \quad (10)$$

$$\times (\mathbf{u}_0 - \hat{\mathbf{u}}_0)(1-s) ds. \quad (11)$$

Taking expectations for  $\mathbf{u}_0$  on both sides, we have

$$\mathbb{E}[p(\mathbf{y}|\mathbf{u}_0)] \quad (12)$$

$$= p(\mathbf{y}|\hat{\mathbf{u}}_0) + \mathbb{E}\left[\int_0^1 (\mathbf{u}_0 - \hat{\mathbf{u}}_0)^\top \quad (13)$$

$$\times \frac{d^2 p(\mathbf{y}|s\mathbf{u}_0 + (1-s)\hat{\mathbf{u}}_0)}{ds^2} (\mathbf{u}_0 - \hat{\mathbf{u}}_0)(1-s) ds\right]. \quad (14)$$

The calculation of  $\frac{d^2 p(\mathbf{y}|s\mathbf{u}_0+(1-s)\hat{\mathbf{u}}_0)}{ds^2}$  is very critical. Assuming  $\mathcal{H}$  is linear, it is not hard to obtain

$$\frac{dp(\mathbf{y}|s\mathbf{u}_0+(1-s)\hat{\mathbf{u}}_0)}{ds} \quad (15)$$

$$= p(\mathbf{y}|s\mathbf{u}_0+(1-s)\hat{\mathbf{u}}_0) \quad (16)$$

$$\times \frac{1}{\sigma^2} [\mathbf{y} - \mathcal{H}(s\mathbf{x}_0+(1-s)\hat{\mathbf{x}}_0)] \mathcal{H}(\mathbf{x}_0 - \hat{\mathbf{x}}_0), \quad (17)$$

and

$$\frac{d^2 p(\mathbf{y}|s\mathbf{u}_0+(1-s)\hat{\mathbf{u}}_0)}{ds^2} \quad (18)$$

$$= p(\mathbf{y}|s\mathbf{u}_0+(1-s)\hat{\mathbf{u}}_0) \frac{\|\mathcal{H}(\mathbf{x}_0 - \hat{\mathbf{x}}_0)\|^2}{\sigma^2} \quad (19)$$

$$\times \left( \frac{\|\mathbf{y} - \mathcal{H}(s\mathbf{x}_0+(1-s)\hat{\mathbf{x}}_0)\|^2}{\sigma^2} - 1 \right). \quad (20)$$

So

$$\mathbb{E}[p(\mathbf{y}|\mathbf{u}_0)] \quad (21)$$

$$= p(\mathbf{y}|\hat{\mathbf{u}}_0) + \mathbb{E}\left[\frac{\|\mathcal{H}(\mathbf{x}_0 - \hat{\mathbf{x}}_0)\|^2 \|\mathbf{x}_0 - \hat{\mathbf{x}}_0\|^2}{\sigma^2}\right] \quad (22)$$

$$\times \int_0^1 p(s)(1-s) \left( \frac{\|\mathbf{y} - \mathcal{H}(s\mathbf{x}_0+(1-s)\hat{\mathbf{x}}_0)\|^2}{\sigma^2} - 1 \right) ds]. \quad (23)$$

Thus conclusion of Eq. (5) is proved.  $\square$

## 2. Posterior Estimation of Ground Truth

**Proposition 2.1.** (Estimate the mean of the initial image and velocity from the current moment) Under the condition of  $\mathbf{u}_t$  at time  $t$ , the posterior mean value of the image at time 0 can be derived from

$$[\boldsymbol{\Sigma}_t^{-1} \mathbf{D}_t \mathbb{E}[\mathbf{u}_0|\mathbf{u}_t]]_{\Delta} = \nabla_{\mathbf{v}_t} \log p(\mathbf{u}_t) + [\boldsymbol{\Sigma}_t^{-1} \mathbf{u}_t]_{\Delta}, \quad (24)$$

where  $\Delta \doteq d+1, d+2, \dots, 2d$  indicates to take the second half of this vector.

*Proof.* First from the transition densities Eq. (2) we have

$$\begin{aligned} & p(\mathbf{u}_t|\mathbf{u}_0) \\ &= \mathcal{N}(\mathbf{u}_t; \boldsymbol{\mu}_t, \boldsymbol{\Sigma}_t) \\ &= \frac{1}{(2\pi)^{d/2} |\boldsymbol{\Sigma}_t|^{1/2}} \exp \left[ -\frac{1}{2} (\mathbf{u}_t - \boldsymbol{\mu}_t)^\top \boldsymbol{\Sigma}_t^{-1} (\mathbf{u}_t - \boldsymbol{\mu}_t) \right] \\ &= \frac{1}{(2\pi)^{d/2} |\boldsymbol{\Sigma}_t|^{1/2}} \exp \left[ -\frac{1}{2} (\mathbf{u}_t - \mathbf{D}_t \mathbf{u}_0)^\top \boldsymbol{\Sigma}_t^{-1} (\mathbf{u}_t - \mathbf{D}_t \mathbf{u}_0) \right] \\ &= \frac{1}{(2\pi)^{d/2} |\boldsymbol{\Sigma}_t|^{1/2}} \exp \left[ -\frac{1}{2} \mathbf{u}_t^\top \boldsymbol{\Sigma}_t^{-1} \mathbf{u}_t \right] \\ &\quad \times \exp \left[ \mathbf{u}_0^\top \mathbf{D}_t^\top \boldsymbol{\Sigma}_t^{-1} \mathbf{u}_t - \frac{1}{2} \mathbf{u}_0^\top \mathbf{D}_t^\top \boldsymbol{\Sigma}_t^{-1} \mathbf{D}_t \mathbf{u}_0 \right]. \end{aligned}$$

To simplify notation, let  $p_0(\mathbf{u}_t) = \frac{1}{(2\pi)^{d/2} |\boldsymbol{\Sigma}_t|^{1/2}} \exp \left[ -\frac{1}{2} \mathbf{u}_t^\top \boldsymbol{\Sigma}_t^{-1} \mathbf{u}_t \right]$ ,  $T(\mathbf{u}_t) = \mathbf{D}_t^\top \boldsymbol{\Sigma}_t^{-1} \mathbf{u}_t$ , and  $\varpi(\mathbf{u}_0) = \frac{1}{2} \mathbf{u}_0^\top \mathbf{D}_t^\top \boldsymbol{\Sigma}_t^{-1} \mathbf{D}_t \mathbf{u}_0$ , then we have

$$p(\mathbf{u}_t|\mathbf{u}_0) = p_0(\mathbf{u}_t) \exp [\mathbf{u}_0^\top T(\mathbf{u}_t) - \varpi(\mathbf{u}_0)].$$

Integrate over initial data and velocity pair distribution we obtain

$$\begin{aligned} p(\mathbf{u}_t) &= \int p(\mathbf{u}_t|\mathbf{u}_0) p(\mathbf{u}_0) d\mathbf{u}_0 \\ &= p_0(\mathbf{u}_t) \int \exp [\mathbf{u}_0^\top T(\mathbf{u}_t) - \varpi(\mathbf{u}_0)] p(\mathbf{u}_0) d\mathbf{u}_0. \end{aligned}$$

In order to get the score, then take the derivative of  $\mathbf{v}_t$  on both sides of the previous formula

$$\begin{aligned} & \nabla_{\mathbf{v}_t} p(\mathbf{u}_t) \\ &= \nabla_{\mathbf{v}_t} p_0(\mathbf{u}_t) \int \exp [\mathbf{u}_0^\top T(\mathbf{u}_t) - \varpi(\mathbf{u}_0)] p(\mathbf{u}_0) d\mathbf{u}_0 \\ &\quad + p_0(\mathbf{u}_t) \int \nabla_{\mathbf{v}_t} [\exp [\mathbf{u}_0^\top T(\mathbf{u}_t) - \varpi(\mathbf{u}_0)]] p(\mathbf{u}_0) d\mathbf{u}_0 \\ &= \frac{\nabla_{\mathbf{v}_t} p_0(\mathbf{u}_t)}{p_0(\mathbf{u}_t)} p(\mathbf{u}_t) \\ &\quad + \left[ p_0(\mathbf{u}_t) \int (\nabla_{\mathbf{u}_t} [T(\mathbf{u}_t)])^\top \mathbf{u}_0 \exp [\mathbf{u}_0^\top T(\mathbf{u}_t) - \varpi(\mathbf{u}_0)] p(\mathbf{u}_0) d\mathbf{u}_0 \right]_{\Delta} \\ &= \frac{\nabla_{\mathbf{v}_t} p_0(\mathbf{u}_t)}{p_0(\mathbf{u}_t)} p(\mathbf{u}_t) \\ &\quad + \left[ (\nabla_{\mathbf{u}_t} [T(\mathbf{u}_t)])^\top \int p_0(\mathbf{u}_t) \mathbf{u}_0 \exp [\mathbf{u}_0^\top T(\mathbf{u}_t) - \varpi(\mathbf{u}_0)] p(\mathbf{u}_0) d\mathbf{u}_0 \right]_{\Delta} \\ &= \frac{\nabla_{\mathbf{v}_t} p_0(\mathbf{u}_t)}{p_0(\mathbf{u}_t)} p(\mathbf{u}_t) \\ &\quad + \left[ (\nabla_{\mathbf{u}_t} [T(\mathbf{u}_t)])^\top \int \mathbf{u}_0 p(\mathbf{u}_t|\mathbf{u}_0) p(\mathbf{u}_0) d\mathbf{u}_0 \right]_{\Delta}. \end{aligned}$$

Divide both sides by  $p(\mathbf{u}_t)$ , that is to say

$$\begin{aligned} & \frac{\nabla_{\mathbf{v}_t} p(\mathbf{u}_t)}{p(\mathbf{u}_t)} \\ &= \frac{\nabla_{\mathbf{v}_t} p_0(\mathbf{u}_t)}{p_0(\mathbf{u}_t)} + \left[ (\nabla_{\mathbf{u}_t} [T(\mathbf{u}_t)])^\top \int \mathbf{u}_0 \frac{p(\mathbf{u}_t|\mathbf{u}_0) p(\mathbf{u}_0)}{p(\mathbf{u}_t)} d\mathbf{u}_0 \right]_{\Delta}. \end{aligned}$$

Transforming the formula and simplifying the notation, we get

$$\begin{aligned} & [\boldsymbol{\Sigma}_t^{-1} \mathbf{D}_t \mathbb{E}[\mathbf{u}_0|\mathbf{u}_t]]_{\Delta} \\ &= \left[ [(\nabla_{\mathbf{u}_t} [T(\mathbf{u}_t)])^\top] \mathbb{E}[\mathbf{u}_0|\mathbf{u}_t] \right]_{\Delta} \\ &= \nabla_{\mathbf{v}_t} \log p(\mathbf{u}_t) - \nabla_{\mathbf{v}_t} \log p_0(\mathbf{u}_t) \\ &= \nabla_{\mathbf{v}_t} \log p(\mathbf{u}_t) + [\boldsymbol{\Sigma}_t^{-1} \mathbf{u}_t]_{\Delta}. \end{aligned}$$

The conclusion of Eq. (24) is proved.  $\square$

## References

- [1] Tim Dockhorn, Arash Vahdat, and Karsten Kreis. Score-based generative modeling with critically-damped langevin diffusion. *arXiv preprint arXiv:2112.07068*, 2021. [1](#)
- [2] Simo Särkkä and Arno Solin. *Applied stochastic differential equations*, volume 10. Cambridge University Press, 2019. [1](#)
